# Supplementary material for: KSR2 Mutations Are Associated with Obesity, Insulin Resistance, and Impaired Cellular Fuel Oxidation
Source: PubMed Central journal article supplement (PMC3898740; doi:10.1016/j.cell.2013.09.058), 2013-11-07
Supplement: mmc1.pdf [file mmc1.pdf]

**Table S1. Cosegregation of *KSR2* Mutations with Overweight/Obesity in Family Members, Related to Figure 1**

| Mutation    | Patients | Heterozygous family members          | Wild type family members             | Prevalence in population based cohort/publically available databases |             |                  |
|-------------|----------|--------------------------------------|--------------------------------------|----------------------------------------------------------------------|-------------|------------------|
|             |          | BMI for adults; BMI SDS for children | BMI for adults; BMI SDS for children | Ely Study                                                            | dbSNP       | MAF NHLBI Exomes |
| K62N        | 1        |                                      | 41; 0                                | -                                                                    | -           | -                |
| F89L        | 1        |                                      | 34, 18                               | -                                                                    | -           | -                |
| W95R        | 1        |                                      |                                      | -                                                                    | -           | -                |
| D124Y       | 1        | 44                                   |                                      | -                                                                    | -           | 0.008            |
| L148V       | 1        |                                      |                                      | -                                                                    | -           | -                |
| T175R       | 8        |                                      |                                      | 5                                                                    | rs200451365 | 0.123            |
| T215A       | 1        |                                      |                                      | -                                                                    | -           | -                |
| R246S       | -        |                                      |                                      | 1                                                                    | -           | -                |
| R253W#      | 1        | 32, 28                               | 29                                   | -                                                                    | -           | -                |
| D323E       | 10       |                                      |                                      | 5                                                                    | rs141457085 | 0.2528           |
| A373T       | 1        |                                      | 40                                   | -                                                                    | -           | 0.0159           |
| R397H       | 1        |                                      |                                      | -                                                                    | -           | R397C (0.0158)   |
| V511Cfsx29  | 1        |                                      |                                      | -                                                                    | -           | -                |
| P542L       | 1        |                                      | 48, 33, 32                           | -                                                                    | -           | -                |
| Y569X       | 1        | 28                                   | 28                                   | -                                                                    | -           | -                |
| E620D       | 1        |                                      |                                      | -                                                                    | -           | -                |
| P662L*      | 1        | 38                                   | 25                                   | -                                                                    | -           | -                |
| E667V*      | 1        |                                      | 24                                   | -                                                                    | rs150163296 | 0.00713          |
| R684C       | 1        |                                      |                                      | -                                                                    | -           | -                |
| R745W       | -        |                                      |                                      | 1                                                                    | -           | 0.0083           |
| I801L       | 1        |                                      |                                      | -                                                                    | -           | -                |
| F807Qfsx41* | 1        | 27; 0.4, 0.6                         | 29                                   | -                                                                    | -           | -                |
| G816D       | 1        | 27                                   | 28, 37, 32                           | 1                                                                    | -           | -                |
| R818Q*      | 1        | 42, 45, 31                           | 40, 31; 2.7, 1.2                     | -                                                                    | -           | R818W (0.008)    |
| L822Pfsx26  | 1        |                                      |                                      | -                                                                    | -           | -                |
| R823H       | 1        |                                      |                                      | -                                                                    | rs183487509 | 0.0079           |
| R838H       | -        |                                      |                                      | 1                                                                    | -           | 0.008            |
| D843N*      | 1        | 30                                   | 26                                   | -                                                                    | -           | 0.008            |
| S904L*      | 4        | 28, 37, 27; 1.2                      | 35, 32; 0.7                          | 2                                                                    | rs201637020 | 0.1827           |
| R936L*      | 1        | 34; 2.4                              | 28                                   | -                                                                    | -           | -                |

Where consent was given, family members of probands carrying *KSR2* mutations were genotyped. The BMI ( $\text{kg}/\text{m}^2$ ) (or BMI sds in children) of 19 family members who were heterozygous for variants or 25 family members who were wild-type, is noted (# denotes homozygous carriers in one family). Some individuals consented to take part in detailed physiological studies and are indicated (\*). Additional data is shown to compare the prevalence of *KSR2* mutations found in severely obese individuals with those found in controls from a population based cohort (the Ely Study) and publically available databases; MAF = minor allele frequency.

**Table S2. Permutation Analysis of Variants Found in Cases and Controls, Related to Figure 1**

**ORIGINAL RESULTS**

| Filter                     | cases           |       | controls        |       | OR   | p-value       |
|----------------------------|-----------------|-------|-----------------|-------|------|---------------|
|                            | # with variants | total | # with variants | total |      |               |
| MAF < 0.005                | 45              | 2101  | 16              | 1536  | 2.08 | 0.0124        |
| MAF < 0.001                | 28              | 2101  | 6               | 1536  | 3.44 | 0.0029        |
| MAF < 0.0005               | 24              | 2101  | 4               | 1536  | 4.43 | 0.0019        |
| <b>Permutation p-value</b> |                 |       |                 |       |      | <b>0.0025</b> |

**REPLICATION RESULTS**

| Filter                     | cases           |       | controls        |       | OR   | p-value       |
|----------------------------|-----------------|-------|-----------------|-------|------|---------------|
|                            | # with variants | total | # with variants | total |      |               |
| MAF < 0.005                | 6               | 238   | 26              | 1117  | 1.09 | 0.8153        |
| MAF < 0.001                | 4               | 238   | 10              | 1117  | 1.89 | 0.2864        |
| MAF < 0.0005               | 4               | 238   | 8               | 1117  | 2.37 | 0.2416        |
| <b>Permutation p-value</b> |                 |       |                 |       |      | <b>0.9987</b> |

**COMBINED RESULTS**

| Filter                     | cases           |       | controls        |       | OR   | p-value       |
|----------------------------|-----------------|-------|-----------------|-------|------|---------------|
|                            | # with variants | total | # with variants | total |      |               |
| MAF < 0.005                | 73              | 2339  | 67              | 2653  | 1.24 | 0.2291        |
| MAF < 0.001                | 34              | 2339  | 29              | 2653  | 1.33 | 0.3094        |
| MAF < 0.0005               | 29              | 2339  | 13              | 2653  | 2.55 | 0.0047        |
| <b>Permutation p-value</b> |                 |       |                 |       |      | <b>0.0063</b> |

MAF = minor allele frequency; OR = odds ratio; # number.

**Table S3. Metabolic Parameters in *KSR2* Mutation Carriers and Obese Controls, Related to Figure 4**

|                                    | <b><i>KSR2</i></b>      | <b>Controls</b>              |
|------------------------------------|-------------------------|------------------------------|
| Systolic Blood Pressure (mmHg)     | 130.2 ± 3.8             | 129.1 ± 2.3                  |
| Diastolic Blood Pressure (mmHg)    | 75.3 ± 3.1              | 78.9 ± 1.5                   |
| Total Cholesterol (mmol/l)         | 4.7 ± 0.2               | 4.9 ± 0.2                    |
| LDL-Cholesterol (mmol/l)           | 3.0 ± 0.1               | 3.2 ± 0.1                    |
| HDL-Cholesterol (mmol/l)           | 1.1 ± 0.1               | 1.1 ± 0.1                    |
| Triglycerides (mmol/l)             | 1.2 ± 0.1               | 1.4 ± 0.2                    |
| Adiponectin (mg/l)                 | 6.4 (range 3.3 to 12.8) | 7.7 (range 0.82 to 28.5)     |
| Urinary Norepinephrine (nmol/24hr) | 109 ± 5                 | Reference range: 63 - 471    |
| Urinary Epinephrine (nmol/24hr)    | 23 ± 1                  | Reference range: 4 - 127     |
| Urinary Dopamine (nmol/l)          | 1149 ± 34               | Reference range: 70 - 1900   |
| Thyroid stimulating hormone (mU/L) | 1.9 ± 0.1               | Reference range: 0.35 - 5.5  |
| Free thyroxine (pmol/l)            | 14 ± 0.4                | Reference range: 11.5 - 22.7 |

Means ±SEM are shown. Where parameters are altered in obesity, data from obese controls is provided. Otherwise, laboratory reference ranges are noted.

**Table S4. Body Composition Data for *Ksr2*<sup>-/-</sup> Mice and Their *Ksr2*<sup>+/+</sup> Littermates, Related to Figure 5**

| Mice                              | N  | Age      | Body Weight (g) | Body Fat (g) | LBM (g)     | % Body Fat   |
|-----------------------------------|----|----------|-----------------|--------------|-------------|--------------|
| <b>Male</b>                       |    |          |                 |              |             |              |
| <i>Ksr2</i> <sup>-/-</sup> ad lib | 4  | 5 weeks  | 23 ± 0.3        | 6 ± 0.3 **   | 17 ± 0.3    | 28 ± 0.9 **  |
| <i>Ksr2</i> <sup>-/-</sup> PF     | 9  | 5 weeks  | 22 ± 1.5        | 6 ± 0.7 **   | 16 ± 0.8    | 25 ± 1.5 *** |
| <i>Ksr2</i> <sup>+/+</sup>        | 12 | 5 weeks  | 21 ± 0.5        | 3 ± 0.2      | 17 ± 0.4    | 16 ± 0.8     |
| <b>9 weeks</b>                    |    |          |                 |              |             |              |
| <i>Ksr2</i> <sup>-/-</sup> ad lib | 4  | 9 weeks  | 48 ± 1.2 ^^     | 22 ± 1 ^^    | 26 ± 0.3 ^^ | 46 ± 1 ^^    |
| <i>Ksr2</i> <sup>-/-</sup> PF     | 9  | 9 weeks  | 28 ± 1.1        | 10 ± 0.8 *** | 18 ± 0.4 *  | 35 ± 1.3 *** |
| <i>Ksr2</i> <sup>+/+</sup>        | 12 | 9 weeks  | 26 ± 0.8        | 6 ± 0.5      | 20 ± 0.6    | 22 ± 1.5     |
| <b>18 weeks</b>                   |    |          |                 |              |             |              |
| <i>Ksr2</i> <sup>-/-</sup> PF     | 9  | 18 weeks | 37 ± 1.3 **     | 16 ± 0.9 *** | 22 ± 1.3    | 41 ± 0.4 *** |
| <i>Ksr2</i> <sup>+/+</sup>        | 12 | 18 weeks | 31 ± 1.6        | 8 ± 1        | 23 ± 2.2    | 24 ± 0.7     |
| <b>Female</b>                     |    |          |                 |              |             |              |
| <b>5 weeks</b>                    |    |          |                 |              |             |              |
| <i>Ksr2</i> <sup>-/-</sup> ad lib | 3  | 5 weeks  | 18 ± 2.1        | 5 ± 1        | 13 ± 1.2    | 26 ± 3.1     |
| <i>Ksr2</i> <sup>-/-</sup> PF     | 6  | 5 weeks  | 18 ± 1.4        | 5 ± 0.7      | 13 ± 0.6    | 26 ± 2.2 *   |
| <i>Ksr2</i> <sup>+/+</sup>        | 10 | 5 weeks  | 17 ± 0.2        | 3 ± 0.2      | 13 ± 0.2    | 19 ± 0.9     |
| <b>9 weeks</b>                    |    |          |                 |              |             |              |
| <i>Ksr2</i> <sup>-/-</sup> ad lib | 3  | 9 weeks  | 40 ± 5.3 ^^     | 20 ± 3.3 ^^  | 20 ± 2 ^    | 50 ± 1.9 ^   |
| <i>Ksr2</i> <sup>-/-</sup> PF     | 6  | 9 weeks  | 22 ± 0.8        | 8 ± 0.5      | 15 ± 0.4    | 34 ± 1.4 **  |
| <i>Ksr2</i> <sup>+/+</sup>        | 10 | 9 weeks  | 20 ± 0.6        | 5 ± 0.5      | 15 ± 0.4    | 24 ± 2.1     |
| <b>18 weeks</b>                   |    |          |                 |              |             |              |
| <i>Ksr2</i> <sup>-/-</sup> ad lib | 1  | 18 weeks | 49              | 24           | 25          | 49           |
| <i>Ksr2</i> <sup>-/-</sup> PF     | 6  | 18 weeks | 27 ± 0.7 *      | 10 ± 0.9 *** | 17 ± 0.4    | 37 ± 2.7 *** |
| <i>Ksr2</i> <sup>+/+</sup>        | 10 | 18 weeks | 23 ± 0.8        | 5 ± 0.6      | 18 ± 0.5    | 22 ± 1.8     |

LBM, lean body mass; PF, pair-fed. Different from *Ksr2*<sup>+/+</sup>: \* p < 0.05, \*\* p < 0.01, \*\*\* p <

0.001; *Ksr2*<sup>-/-</sup> ad lib different from *Ksr2*<sup>-/-</sup> PF and *Ksr2*<sup>+/+</sup>: ^ p < 0.01, ^^ p < 0.001.
